# Supplementary material for: Ionic liquid-based liposome for selective SERS detection
Source: Royal Society of Chemistry journal article supplement (doi:10.1039/d1ra07535g), 2021-01-01
Supplement: d1ra07535g1.pdf [file d1ra07535g1.pdf]

## *Supporting Information*

### **Ionic liquids-based liposome for selective SERS detection**

Huiting Wang,<sup>a</sup> Hairan Zhang,<sup>b</sup> Ling Zhang,<sup>c</sup> Shibo Zhao,<sup>a</sup> Yaxian Chen,<sup>a</sup> Yu Wan,<sup>a</sup>

Qian Zhang,<sup>\*a</sup> and Lixin Xia,<sup>\*a,d</sup>

<sup>a</sup>College of Chemistry, Liaoning University, Shenyang 110036, China.

<sup>b</sup>School of Chemical and Environment Science, Shaanxi Key Laboratory of Catalysis, Shaanxi University of Technology, Hanzhong 723001, China.

<sup>c</sup>College of Chemistry and Life Science, Shenyang Normal University, Shenyang 110034, China.

<sup>d</sup>Yingkou Institute of Technology, Yingkou 115014, China.

---

\*Corresponding author. Tel: 86-24-62202380; E-mail: [zhangq@lnu.edu.cn](mailto:zhangq@lnu.edu.cn) (QZ),  
[lixinxia@lnu.edu.cn](mailto:lixinxia@lnu.edu.cn) (LXX).

## Experimental Details

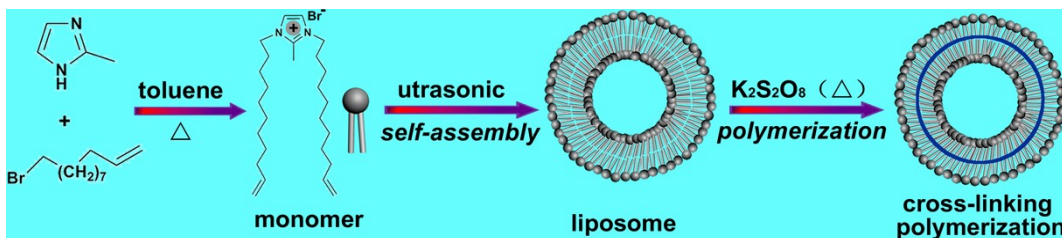

**Scheme S1** Schematic diagram for the synthesis of ternary co-assembled SERS platform.

The ILs-based liposome was prepared according to a previously reported method with some modifications.[1] As shown in Scheme S1, the synthesis process was consisted of two steps. First, the lipid of liposome comprising a hydrophilic imidazolium head and two long hydrophobic alkenyl tails was synthesized, and the vesicle-like liposome was formed through subsequent self-organization under ultrasound. Second, the innate structure of the liposome was reinforced through thermally initiated polymerization of the C=C bonds in the long lipid tails. This effectively ‘froze’ the unique isotropic structure and vesicular shape, thereby achieving liposome with remarkably physical stability.[2]

The as-prepared lipid was characterized by  $^1\text{H-NMR}$  spectra in  $\text{CD}_3\text{OD}$ .

$^1\text{H NMR}$  ( $\text{CD}_3\text{OD}$ , **Fig. S1**):  $\delta=7.46$  (s, 2H, ) , 5.77-5.62 (ddt, 2H, ) , 4.92-4.79 (m, 4H, ) , 4.11-3.98 (m, 4H, ) , 2.55 (s, 3H, ) , 2.00-1.87 (q, ) , 1.79-1.66 (d, ) , 1.37-1.31 ppm (d, ) .

The elemental analysis of the as-prepared liposome was characterized by EDS (%) for C 77.5, N 20.4, Br 2.1 (**Fig. S2**).

A series of structural characterizations of the related liposome materials were carried out: DLS (**Fig. S3**), UV-Vis (**Fig. S5**), FT-IR (**Fig. S6**) and XPS (**Fig. S7**).

## Figures

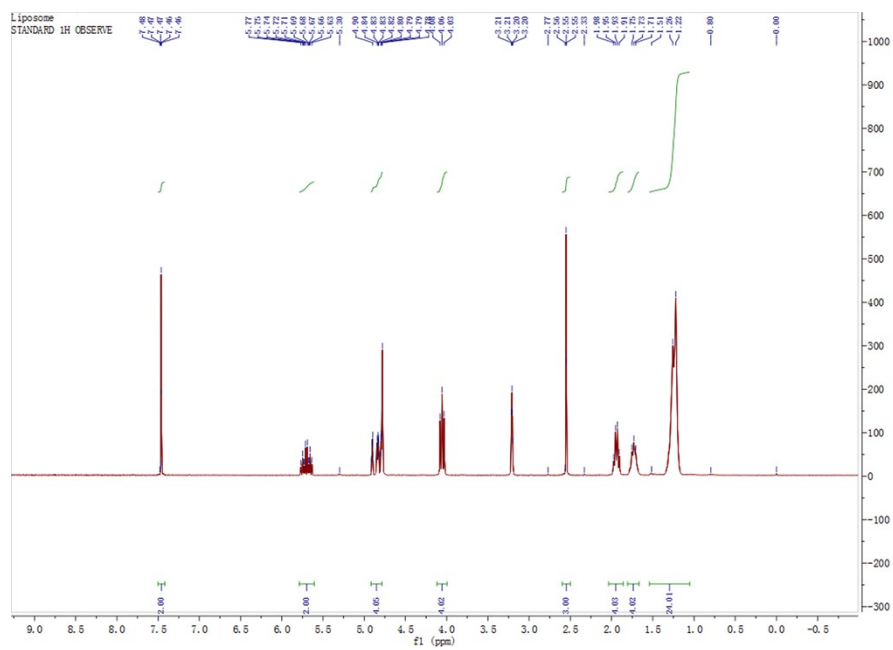

Fig. S1 <sup>1</sup>H-NMR spectra of the lipid of ILs-based liposome in CD<sub>3</sub>OD.

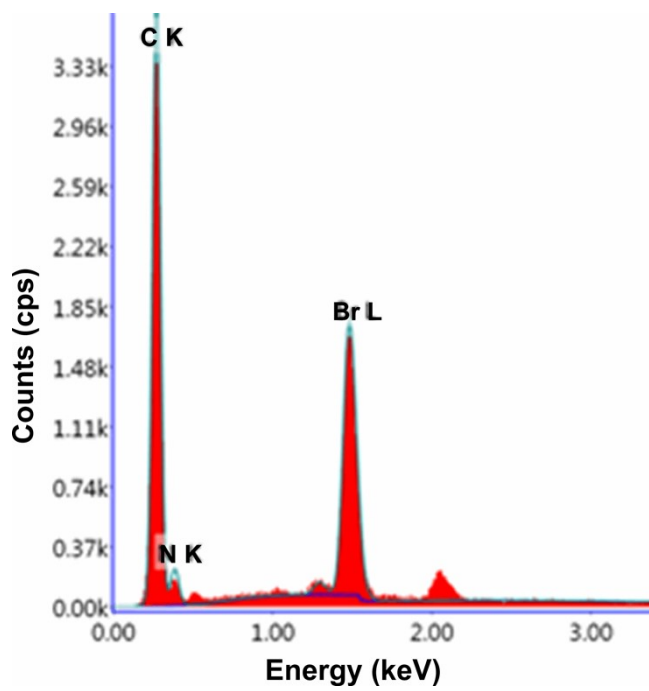

Fig. S2 EDS analysis of the ILs-based liposome.

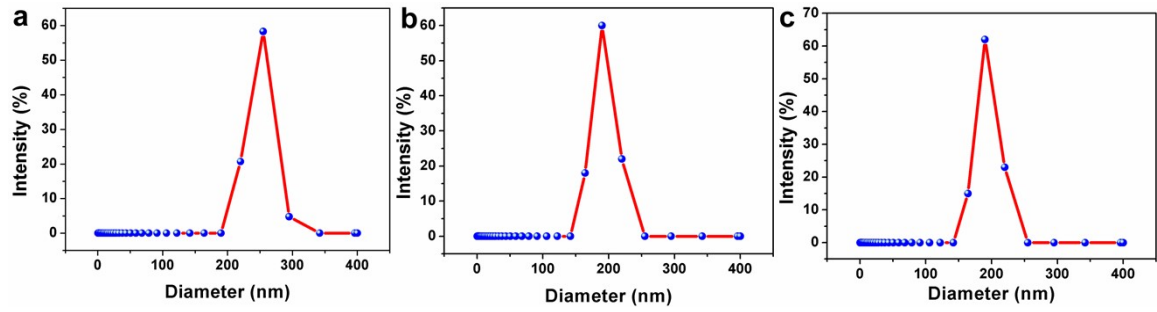

**Fig. S3** Dynamic light scattering (DLS) data of liposome (a), polymerized liposome (b) and liposome@Au NPs (c) dispersed in aqueous solution.

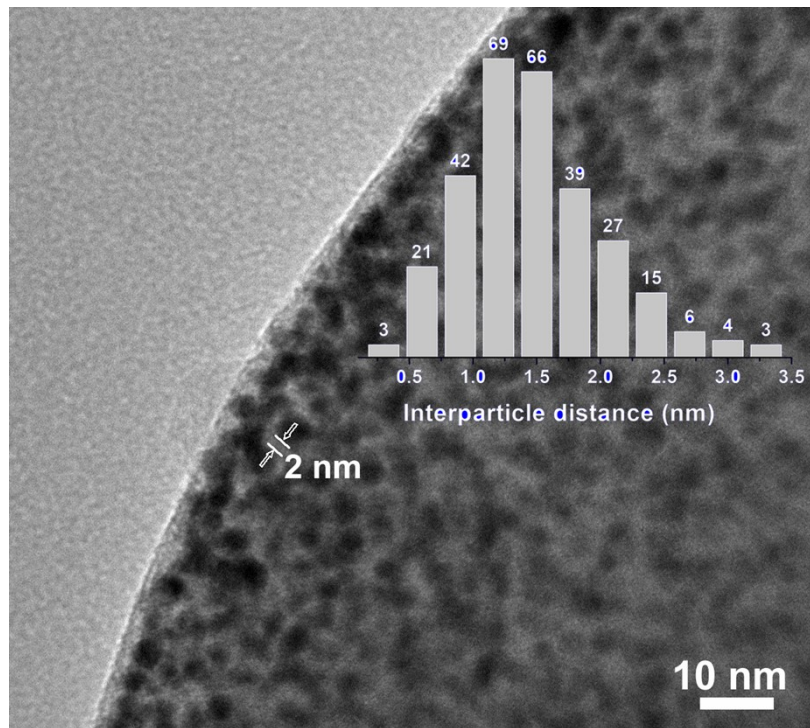

**Fig. S4** Interparticle distance of liposome@Au NPs.

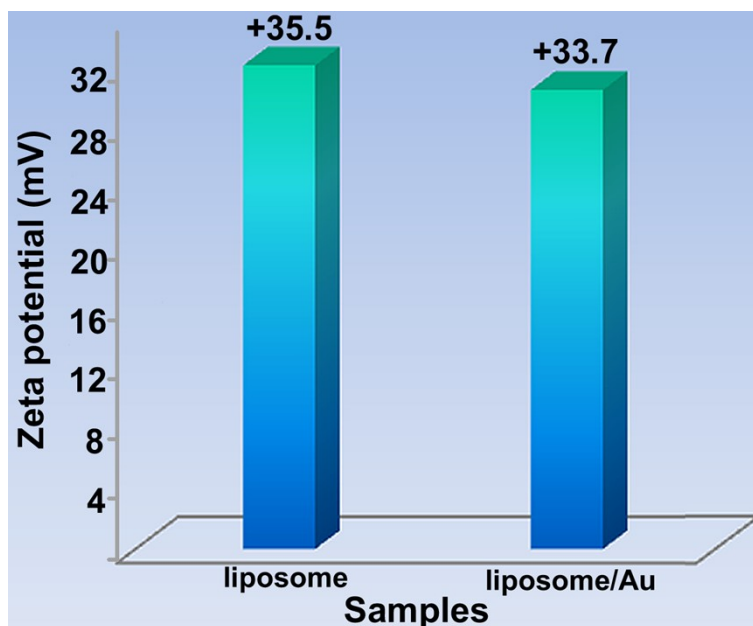

Fig. S5 Zeta potential of liposome and liposome@Au NPs.

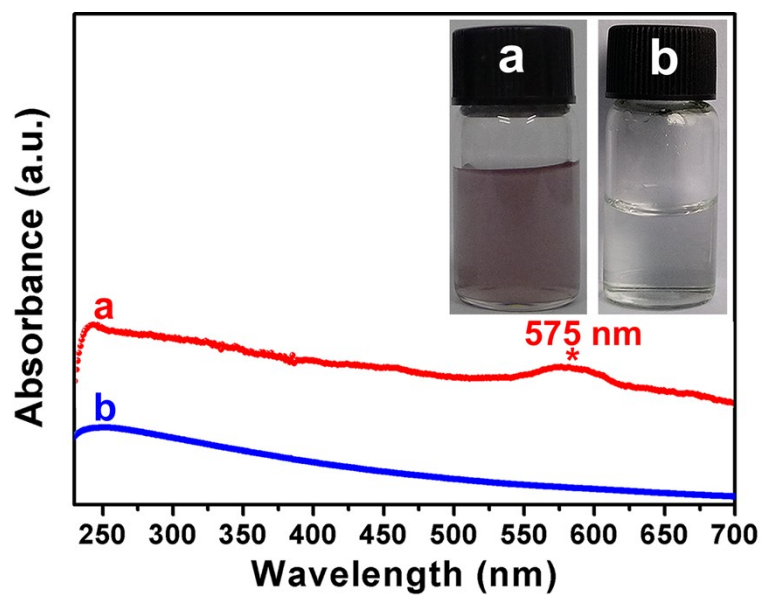

Fig. S6 UV-Vis spectra of liposome@Au NPs (a) and polymerized liposome (b). Inset: Digital photos of liposome@Au NPs (a) and polymerized liposome (b) in aqueous dispersion.

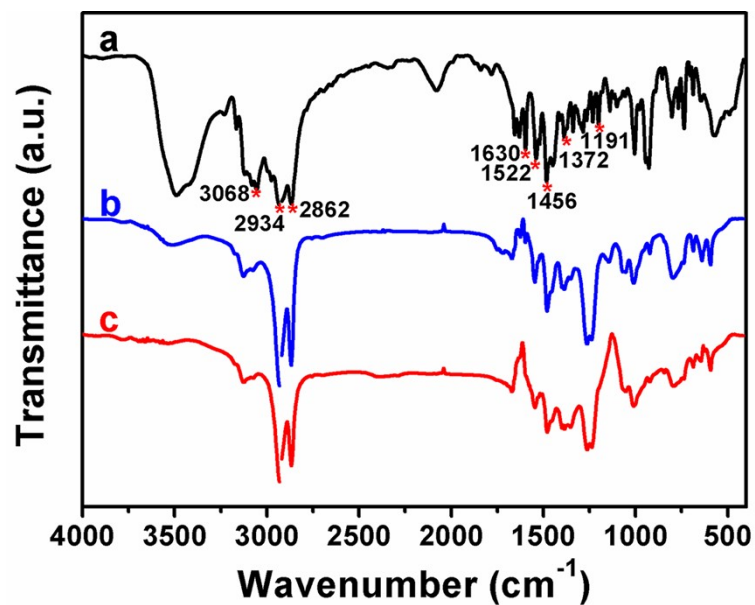

Fig. S7 FT-IR spectra of liposome (a), polymerized liposome (b) and liposome@Au NPs (c).

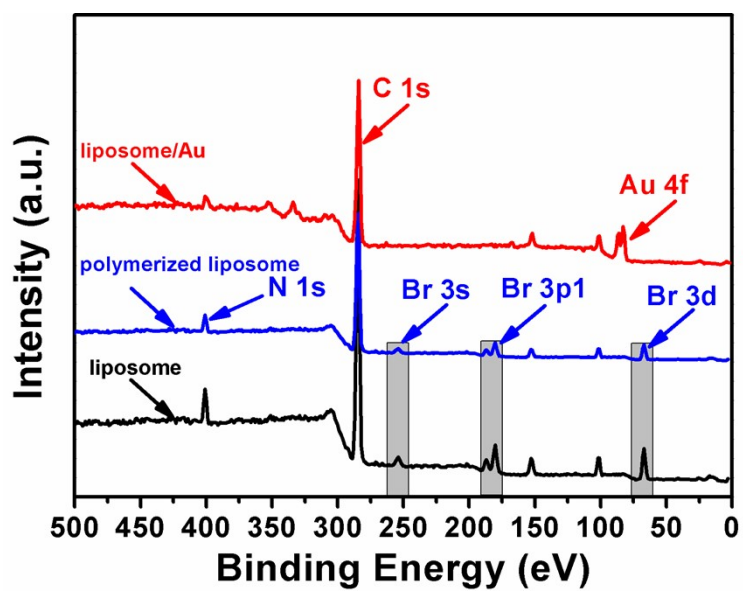

Fig. S8 XPS spectra of liposome, polymerized liposome and liposome@Au NPs.

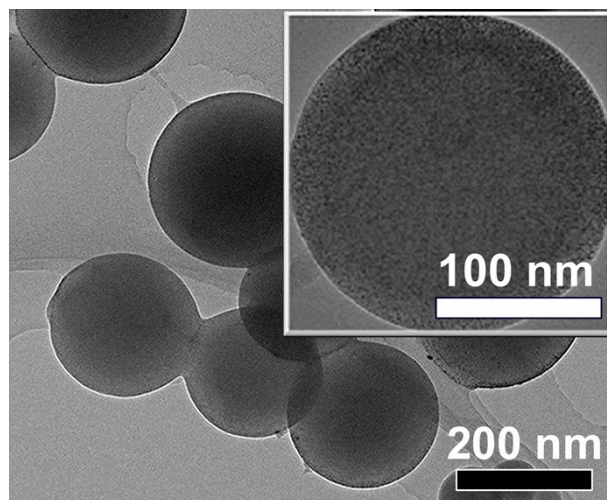

**Fig. S9** TEM image of liposome@Au NPs/EBA.

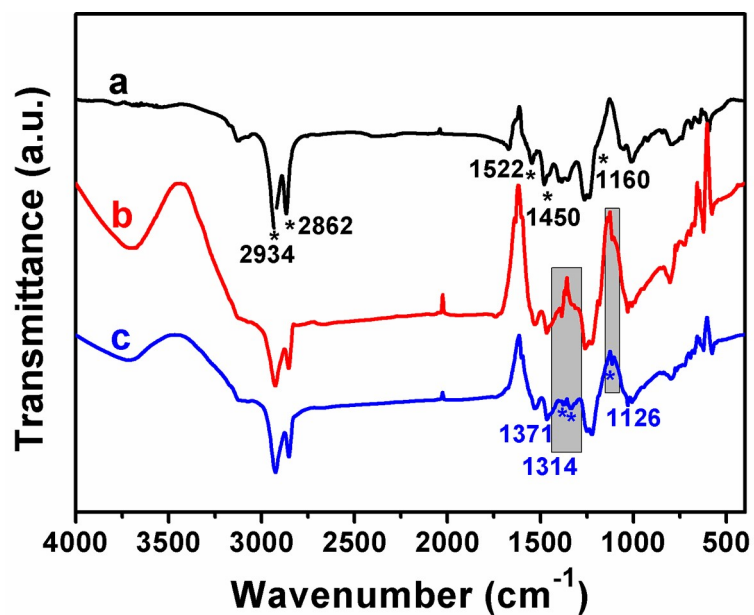

**Fig. S10** FT-IR spectra of liposome@Au NPs (a), liposome/MO (b) and liposome@Au NPs/MO (c).



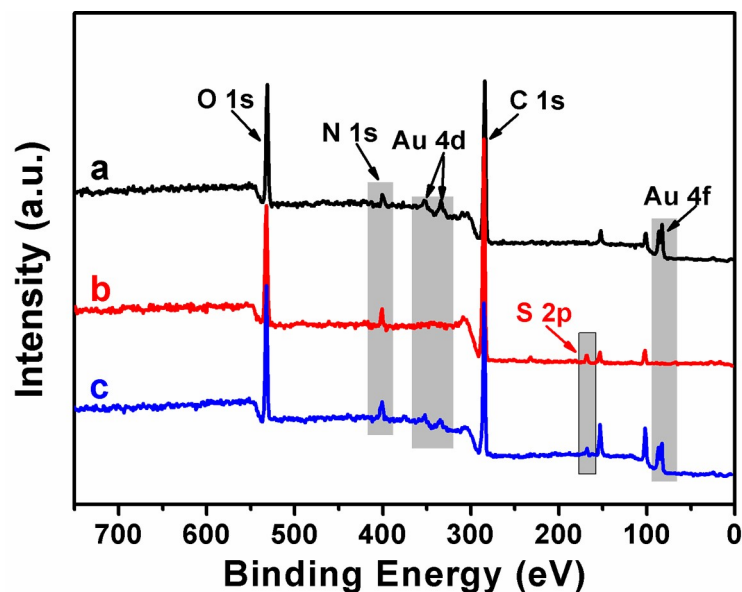

Fig. S11 XPS spectra of liposome@Au NPs (a), liposome/MO (b) and liposome@Au NPs/MO (c).

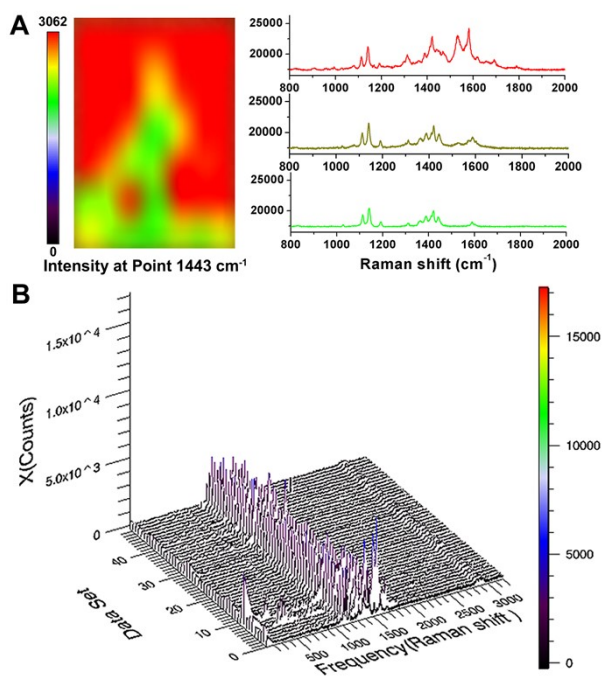

Fig. S12 Mapping image of the peak position at 1443 cm<sup>-1</sup> obtained using Wire 4.0 software and different colors indicate the distribution of 1443 cm<sup>-1</sup> peak intensity (A). 3D representation of Raman spectral mapping of polymerized liposome@Au NPs/MO after baseline correction (Data set corresponds to the Raman spectral data number; the upright axis indicates the Raman intensity) (B).



Conditions: concentration of target molecule:  $1.0 \times 10^{-6}$  M; excitation wavelength: 633 nm; power: 1.7 mW; Lens: 50× objective; acquisition time: 10 s.

## References

- 1 Y. Qiao, K. Tahara, Q. Zhang, X. M. Song and J. KiKuchi, *Chem. Eur. J.* 2016, **22**, 1340–1348.
- 2 S. L. Regen, A. Singh, G. Oehme, M. Singh, *J. Am. Chem. Soc.*, 1982, **104**, 191–795.
